# Supplementary material for: Brain Penetration of Lorlatinib: Cumulative Incidences of CNS and Non-CNS Progression with Lorlatinib in Patients with Previously Treated ALK-Positive Non-Small-Cell Lung Cancer
Source: PubMed Central journal article supplement — Target Oncol. 2020 Feb 14;15(1):55–65. doi: 10.1007/s11523-020-00702-4 (PMC7028836; doi:10.1007/s11523-020-00702-4), 2020-02-14
Supplement: 11523_2020_702_MOESM1_ESM.pdf [file 11523_2020_702_MOESM1_ESM.pdf]

## **Appendix A.**

### **Brain penetration of lorlatinib: cumulative incidences of CNS and non-CNS progression with lorlatinib in patients with previously treated ALK-positive non-small cell lung cancer**

**Running head:** CIRs of CNS and non-CNS progression with lorlatinib in ALK-positive NSCLC

Todd M. Bauer,<sup>1</sup> Alice T. Shaw,<sup>2</sup> Melissa L. Johnson,<sup>1</sup> Alejandro Navarro,<sup>3</sup> Justin F. Gainor,<sup>2</sup> Holger Thurm,<sup>4</sup> Yazdi K. Pithavala,<sup>4</sup> Antonello Abbattista,<sup>5</sup> Gerson Peltz,<sup>6</sup> Enriqueta Felip,<sup>3</sup>

<sup>1</sup>Sarah Cannon Cancer Research Institute/Tennessee Oncology, PLLC, 250 25th Ave N, Nashville, TN, USA;

<sup>2</sup>Massachusetts General Hospital, 55 Fruit St, Boston, MA 02114, USA; <sup>3</sup>Vall d'Hebron University Hospital, Vall d'Hebron Institute of Oncology (VHIO), Passeig de la Vall d'Hebron, 119-129, 08035 Barcelona, Spain;

<sup>4</sup>Pfizer Oncology, 10777 Science Center Dr, La Jolla, CA, USA; <sup>5</sup>Pfizer Oncology, Via Anna Maria Mozzoni, 12, Milan, Italy; <sup>6</sup>Pfizer Oncology, 280 Shennecossett Rd, Groton, CT, USA

**TABLE A.1.** Cumulative incidence probabilities for CNS progression, non-CNS progression, and death at 6 and 12 months for patients who had received a second-generation ALK TKI\* as their last prior ALK TKI (n = 121)

| <b>Cumulative incidence probability (95% CI)</b> |                                             |                                                |
|--------------------------------------------------|---------------------------------------------|------------------------------------------------|
| <b>Months</b>                                    | <b>Baseline CNS metastases<br/>(n = 80)</b> | <b>No baseline CNS metastases<br/>(n = 41)</b> |
| <b>CNS progression</b>                           |                                             |                                                |
| 6 months                                         | 0.15 (0.08–0.24)                            | 0.11 (0.03–0.23)                               |
| 12 months                                        | 0.23 (0.14–0.33)                            | 0.11 (0.03–0.23)                               |
| <b>Non-CNS progression</b>                       |                                             |                                                |
| 6 months                                         | 0.27 (0.18–0.38)                            | 0.38 (0.23–0.54)                               |
| 12 months                                        | 0.37 (0.26–0.48)                            | 0.53 (0.35–0.67)                               |
| <b>Death</b>                                     |                                             |                                                |
| 6 months                                         | 0.06 (0.02–0.13)                            | 0.06 (0.01–0.17)                               |
| 12 months                                        | 0.06 (0.02–0.13)                            | 0.08 (0.02–0.20)                               |

ALK, anaplastic lymphoma kinase; CI, confidence interval; CNS, central nervous system; TKI, tyrosine kinase inhibitor.

\*Second-generation ALK TKIs included: alectinib (n=62), ceritinib (n=47), brigatinib (n=8); other TKI (ensartinib or entrectinib) (n=4).

**Table A.2.** Intracranial response\* by derived independent central review in patients with previously irradiated brain lesions in progression at baseline

|                                           | Prior crizotinib <sup>†</sup><br>(EXP2-3A; n = 8) | At least 1 prior second-generation<br>ALK TKI <sup>†</sup><br>(EXP3B-5; n = 30) |
|-------------------------------------------|---------------------------------------------------|---------------------------------------------------------------------------------|
| Best overall intracranial response, n (%) |                                                   |                                                                                 |
| Complete response                         | 1 (12.5)                                          | 5 (16.7)                                                                        |
| Partial response                          | 3 (37.5)                                          | 7 (23.3)                                                                        |
| Stable disease                            | 3 (37.5)                                          | 10 (33.3)                                                                       |
| Objective progression                     | 0                                                 | 7 (23.3)                                                                        |
| Indeterminate                             | 1 (12.5)                                          | 1 (3.3)                                                                         |
| Objective response rate, n (%)            | 4 (50.0)                                          | 12 (40.0)                                                                       |
| 95% CI                                    | 15.7-84.3                                         | 22.7-59.4                                                                       |
| Duration of intracranial response, months |                                                   |                                                                                 |
| Median                                    | NR                                                | 12.4                                                                            |
| 95% CI                                    | 2.8-NR                                            | 11.1-NR                                                                         |

ALK, anaplastic lymphoma kinase; CI, confidence interval; EXP, expansion cohort; NR, not reported; TKI, tyrosine kinase inhibitor

\*Intracranial response based on irradiated brain lesions with progression at baseline and new brain lesions only

<sup>†</sup>With or without chemotherapy.

**TABLE A.3.** Treatment-related AEs associated with the CNS in patients with  $\geq 1$  ALK TKI (EXP2–5; n = 198)

| TRAE                           | Baseline CNS metastases<br>(n = 131) |         |         | No baseline CNS metastases<br>(n = 67) |         |         |
|--------------------------------|--------------------------------------|---------|---------|----------------------------------------|---------|---------|
|                                | Any grade                            | Grade 3 | Grade 4 | Any grade                              | Grade 3 | Grade 4 |
| Any TRAE                       | 71 (54.2)                            | 3 (2.3) | 0       | 33 (49.3)                              | 4 (6.0) | 1 (1.5) |
| Nervous system disorders*      |                                      |         |         |                                        |         |         |
| Cognitive effects <sup>†</sup> | 34 (26.0)                            | 1 (0.8) | 0       | 13 (19.4)                              | 1 (1.5) | 0       |
| Speech effects <sup>†</sup>    | 11 (8.4)                             | 0       | 0       | 7 (10.4)                               | 1 (1.5) | 0       |
| Headache                       | 11 (8.4)                             | 0       | 0       | 6 (9.0)                                | 0       | 0       |
| Dizziness                      | 10 (7.6)                             | 0       | 0       | 6 (9.0)                                | 0       | 0       |
| Dysgeusia                      | 5 (3.8)                              | 0       | 0       | 4 (6.0)                                | 0       | 0       |
| Psychiatric disorders*         |                                      |         |         |                                        |         |         |
| Mood effects <sup>†</sup>      | 22 (16.8)                            | 2 (1.5) | 0       | 11 (16.4)                              | 1 (1.5) | 0       |
| Insomnia                       | 8 (6.1)                              | 0       | 0       | 2 (3.0)                                | 0       | 0       |
| Hallucinations <sup>†</sup>    | 5 (3.8)                              | 0       | 0       | 9 (13.4)                               | 1 (1.5) | 1 (1.5) |

NOTE. Data are given as No. (%)

ALK, anaplastic lymphoma kinase; AE, adverse event; CNS, central nervous system; EXP, expansion cohort; TKI, tyrosine kinase inhibitor; TRAE, treatment-related AE

\*TRAEs are listed if they were reported in  $\geq 5\%$  of patients in either subgroup<sup>†</sup>This item comprised a cluster of AEs that may represent similar clinical symptoms or syndromes
